# Supplementary material for: A Novel Isoprene Synthase from the Monocot Tree Copernicia prunifera (Arecaceae) Confers Enhanced Drought Tolerance in Transgenic Arabidopsis
Source: MDPI journal article supplement (doi:10.3390/ijms242015329), 2023-10-18

**A novel isoprene synthase from the monocot tree *Copernicia prunifera* (Arecaceae) confers enhanced drought tolerance in transgenic *Arabidopsis*.**

Yu Jiamei<sup>1,2</sup>, Iuliia Khomenko<sup>3</sup>, Franco Biasioli<sup>3</sup>, Mingai Li<sup>1,4</sup> and Claudio Varotto<sup>1,4</sup>

<sup>1</sup> Biodiversity, Ecology and Environment Area, Research and Innovation Centre, Fondazione Edmund Mach, via Mach 1, 38098, San Michele all'Adige, Trento, Italy

<sup>2</sup> Department of Biology, University of Padova, Via Ugo Bassi 58B, Padova 35121, Italy

<sup>3</sup> Food and Nutrition Area, Research and Innovation Centre, Fondazione Edmund Mach, via Mach 1, 38098, San Michele all'Adige, Trento, Italy

<sup>4</sup> NBFC, National Biodiversity Future Center, Palermo 90133, Italy

**Supplementary Table S1: Primers used in this study.**

| Primer name     | Sequence (5' - 3')           | Purpose                           |
|-----------------|------------------------------|-----------------------------------|
| EgulSPS_GW-Rev1 | GGAAACCCGTGCTCTCTAAGGAGTC    | GenomeWalker                      |
| EgulSPS_GW-Rev2 | GTCATCTTTGAACATCAAGTCTGCCCTC | GenomeWalker                      |
| ISPS_For        | CCAAACAATAGAAGTAGCTCAAGC     | full-length cDNA cloning          |
| ISPS_Rev        | CCCTTCTACACATTGCTGACC        | full-length cDNA cloning          |
| CprISPS_For     | CACCATGGCATTCTCTACATGCTTCG   | pENTR cloning                     |
| CprISPS_Rev     | CTACACATTGCTGACCACCAACCT     | pENTR cloning                     |
| pK7WG2_For      | GACAATCTGATCCAAGCTCAAGC      | Screening for transgene           |
| CprISPS_RT_For  | CAGCAATCAATCTTGGACGG         | Semi-quantitative RT-PCR          |
| CprISPS_RT_Rev  | CTACACATTGCTGACCACCA         | Semi-quantitative RT-PCR          |
| DREB2A_RT_For   | CTACAAAGCCTCAACTACGGAATAC    | qRT-PCR                           |
| DREB2A_RT_Rev   | AAACTCGGATAGAGAATCAACAGTC    | qRT-PCR                           |
| COR15A_RT_For   | GATACATTGGGTAAAGAAGCTGAGA    | qRT-PCR                           |
| COR15A_RT_Rev   | ACATGAAGAGAGAGGATATGGATCA    | qRT-PCR                           |
| RAB18_RT_For    | GGAAGAAGGGAATAACACAAAAGAT    | qRT-PCR                           |
| RAB18_RT_Rev    | GCGTTACAAACCCTCATTATTTTTA    | qRT-PCR                           |
| AtEF1α_RT_For   | TGAGCACGCTCTTCTTGCTTTCA      | qRT-PCR; Semi-quantitative RT-PCR |
| AtEF1α_RT_Rev   | GGTGGTGGCATCCATCTTGTTACA     | qRT-PCR; Semi-quantitative RT-PCR |
| AtGAPDH_RT_For  | TTGGTGACAACAGGTCAAGCA        | qRT-PCR                           |
| AtGAPDH_RT_Rev  | AAACTTGTCGCTCAATGCAAT        | qRT-PCR                           |

**Supplementary Figure S1:** Expression levels (semi-quantitative RT-PCR) of the *CpriSPS* transgene in the two Arabidopsis transgenic lines used in this study for all experiments. The gene *EF1 $\alpha$*  from Arabidopsis (*AtEF1 $\alpha$* ) was used as normalization control.

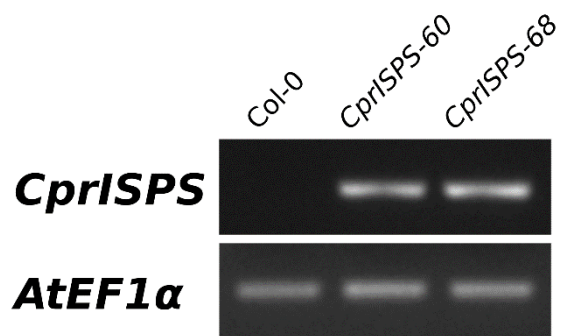

Supplement: s1 [file s1]
